# Supplementary material for: Asymmetric cyano-rich crystalline carbon nitride with a powerful dipole field for efficient hydrogen peroxide photosynthesis
Source: Royal Society of Chemistry journal article supplement (doi:10.1039/d4ta06956k), 2024-12-16
Supplement: d4ta06956k1.pdf [file d4ta06956k1.pdf]

**Asymmetric cyano-rich crystalline carbon nitride with powerful dipole field for efficient hydrogen peroxide photosynthesis**

Wenyong Yu, Rui Xing, Na Tian\*, Yinghui Wang, Na Zhang\*, Yihe Zhang, Yanxi Deng\*, Hongwei Huang

Engineering Research Center of Ministry of Education for Geological Carbon Storage and Low Carbon Utilization of Resources, Beijing Key Laboratory of Materials Utilization of Nonmetallic Minerals and Solid Wastes, National Laboratory of Mineral Materials, School of Materials Science and Technology, China University of Geosciences (Beijing), Beijing 100083, China

\*Corresponding author: [tianna65@cugb.edu.cn](mailto:tianna65@cugb.edu.cn) (N. Tian); [nazhang@cugb.edu.cn](mailto:nazhang@cugb.edu.cn); [dengyx@cugb.edu.cn](mailto:dengyx@cugb.edu.cn)

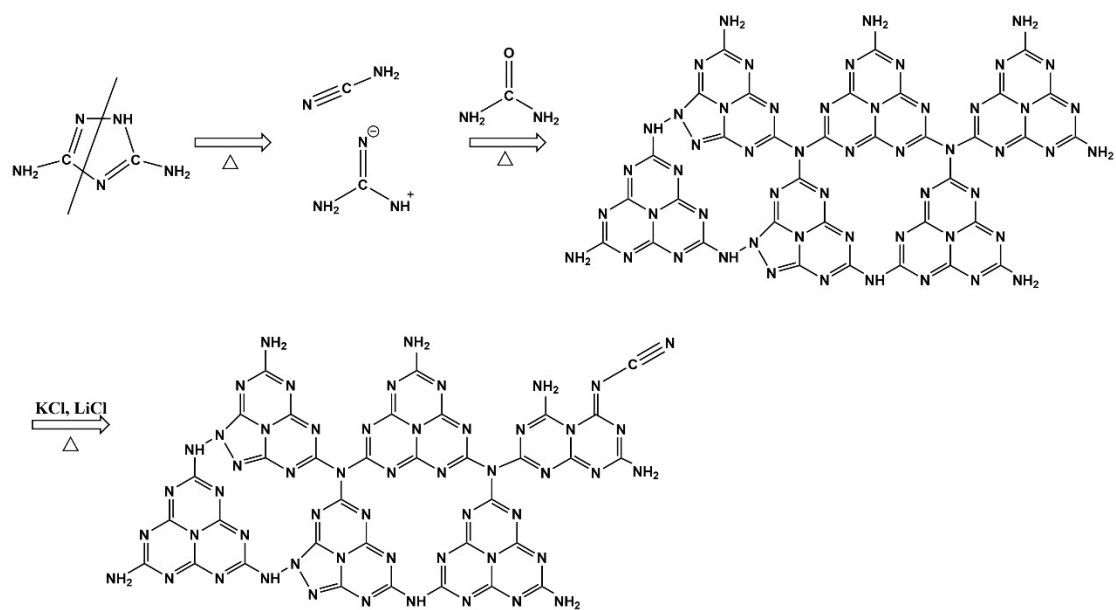

Scheme S1. Schematic illustration of the synthesis process of MACN.

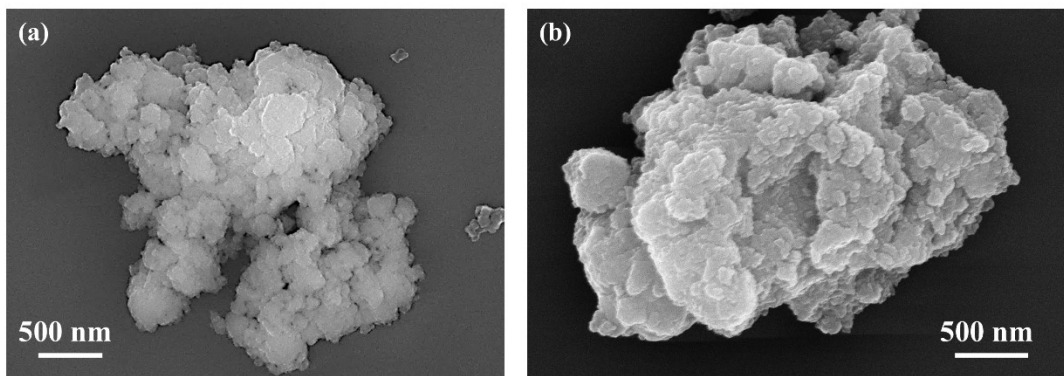

Figure S1. SEM images of (a, b) MACN.

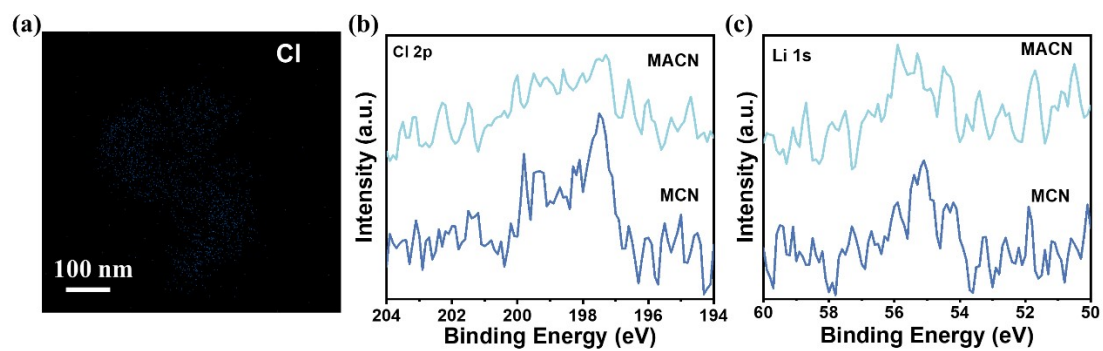

Figure S2. (a) EDX elemental mapping images of Cl element of MACN, and High-resolution XPS spectra of (b) Cl 2p and (c) Li 1s over MACN.

| <b>Elements</b><br><b>Samples</b> | <b>N (%)</b> | <b>C (%)</b> | <b>H (%)</b> | <b>C/N (%)</b> |
|-----------------------------------|--------------|--------------|--------------|----------------|
| <b>BCN</b>                        | 60.85        | 34.57        | 2.26         | 56.81          |
| <b>ACN</b>                        | 60.29        | 34.13        | 2.23         | 56.61          |
| <b>MCN</b>                        | 43.94        | 26.6         | 2.62         | 60.54          |
| <b>MACN</b>                       | 43.92        | 26.35        | 2.52         | 60.00          |

Table S1. The elemental analysis of BCN, ACN, MCN and MACN

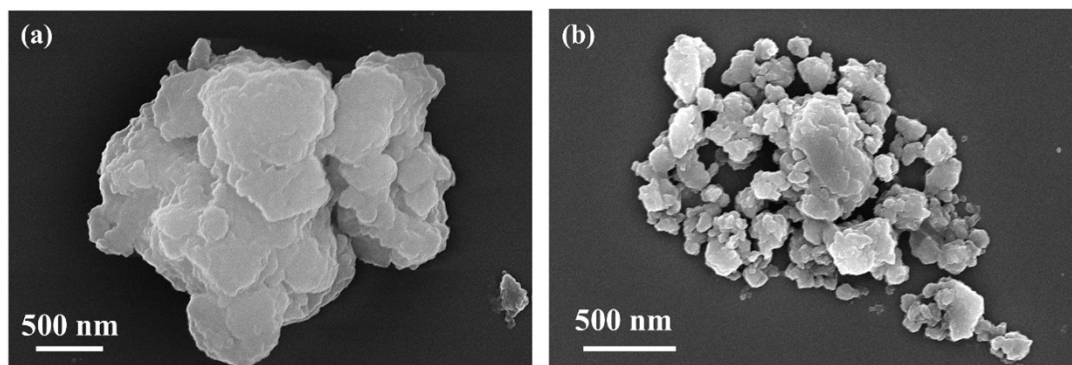

Figure S3. SEM images of (a, b) MACN after the photocatalytic reaction.

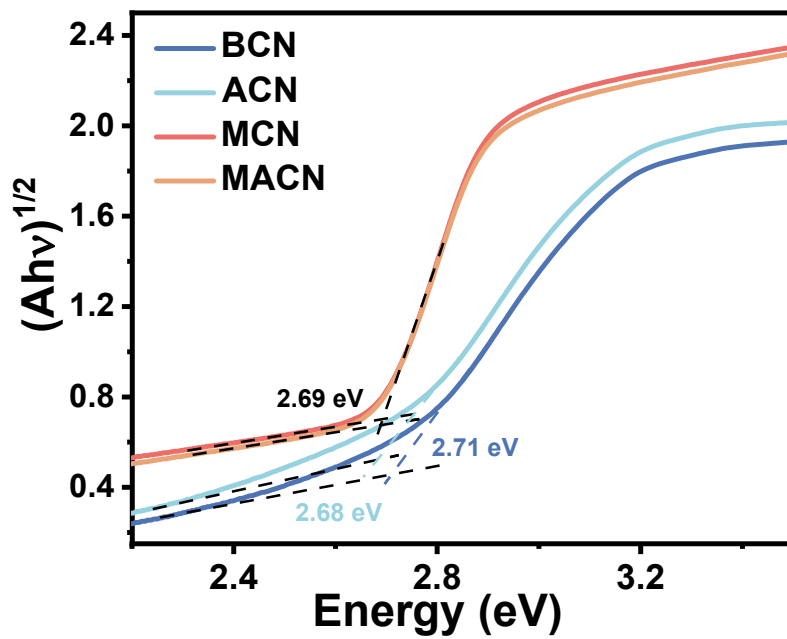

Figure S4. Band gaps of (a) BCN, (b) ACN, (c) MCN and (d) MACN.

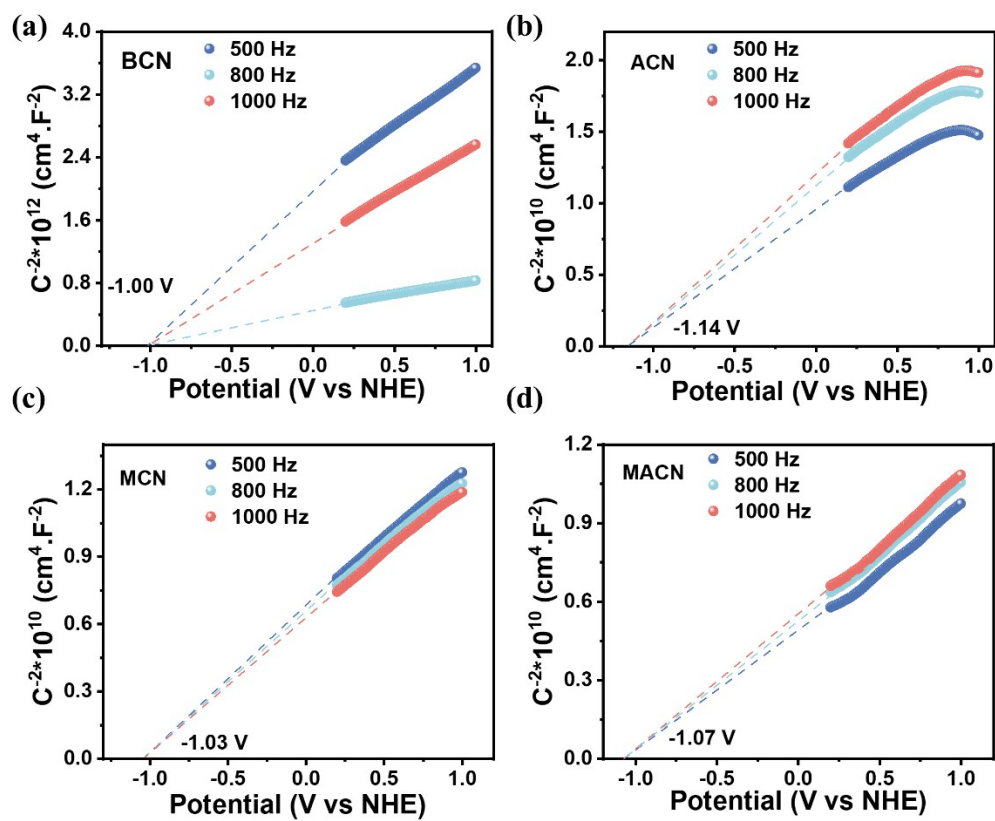

Figure S5. Mott-Schottky plots of (a) BCN, (b) ACN, (c) MCN and (d) MACN.
